# Supplementary material
Source: Springer Nature journal article supplement (https://www.springermedizin.de/resource/supplementary/12888_2009_663_MOESM5_ESM.pdf/9478092)

**Subgroup within study****Study name****Statistics for each study****Events / Total****Odds ratio and 95% CI**

|                 |                              | Odds ratio   | Lower limit  | Upper limit  | Events / Total |              |
|-----------------|------------------------------|--------------|--------------|--------------|----------------|--------------|
|                 |                              |              |              |              | Black          | White        |
| Community       | Huang, 2006 <sup>8</sup>     | 1.164        | 1.087        | 1.245        | 1368 / 8245    | 3578 / 24507 |
| Community       |                              | <b>1.164</b> | <b>1.087</b> | <b>1.245</b> |                |              |
| Health services | Compton, 2000 <sup>2</sup>   | 0.855        | 0.578        | 1.265        | 109 / 258      | 77 / 167     |
| Health services | Castaneda, 1985 <sup>3</sup> | 0.613        | 0.368        | 1.023        | 25 / 558       | 41 / 577     |
| Health services | Coid, 2000 <sup>4</sup>      | 0.217        | 0.151        | 0.313        | 33 / 628       | 452 / 2224   |
| Health services | Maden, 1999 <sup>1</sup>     | 0.221        | 0.088        | 0.558        | 6 / 100        | 28 / 125     |
| Health services | Coid, 1999 <sup>5</sup>      | 0.209        | 0.145        | 0.301        | 33 / 648       | 470 / 2303   |
| Health services |                              | <b>0.357</b> | <b>0.188</b> | <b>0.677</b> |                |              |
| Prison          | Trestman, 2007 <sup>7</sup>  | 0.759        | 0.510        | 1.131        | 78 / 177       | 111 / 218    |
| Prison          |                              | <b>0.759</b> | <b>0.510</b> | <b>1.131</b> |                |              |

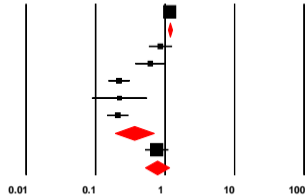

Supplement: MOESM5 [file 9478092]
